# Supplementary material
Source: MDPI journal article supplement (https://www.mdpi.com/2410-3888/9/5/153)
Supplement: s1 [file s1]

**Table S1.** Sampling sites and number of individuals in the study

| Scientific name                 | Location                | Code | Water system        | N  | Location                        |
|---------------------------------|-------------------------|------|---------------------|----|---------------------------------|
| <i>Liobagrus geumgangensis</i>  | Jicheon Stream          | LgJC | Geumgang River      | 20 | 36°23'56.97" N, 126°51'39.83" E |
| <i>Liobagrus geumgangensis</i>  | Geumgang River (Gongju) | LgGJ | Geumgang River      | 20 | 36°21'20.08" N, 127°15'13.13" E |
| <i>Liobagrus geumgangensis</i>  | Mangyeonggang River     | LgMG | Mangyeonggang River | 20 | 35°58'27.51" N, 127°12'55.67" E |
| <i>Liobagrus mediadiposalis</i> | Muju-namdaecheon Stream | LmMJ | Geumgang River      | 19 | 36°00'15.28" N, 127°39'24.79" E |

N: Number of samples.
